# Supplementary material
Source: Royal Society of Chemistry journal article supplement (doi:10.1039/d6dt00722h)
Supplement: d6dt00722h1.pdf [file d6dt00722h1.pdf]

## Electronic Supplementary Information

A Ligand in the Metal Salt Sea: Extreme Metal-to-Ligand Ratios and the Thermodynamic Driving Force of the Halogen Bond

*Alper Yardan, Department of Chemistry and Chemical Processing Technologies, Altinoluk Vocational School, Balikesir University, Edremit, Balikesir, Turkey*

*E-mail: alperyardan@gmail.com*

### Table of Contents

|                                                                                                       |          |
|-------------------------------------------------------------------------------------------------------|----------|
| <b>Figure S1.</b> DTG curves of the free ligand and complexes <b>1–6</b> .....                        | Page S3  |
| <b>Figure S2.</b> Rietveld refinement profiles for the PXRD data of the complex <b>1</b> .....        | Page S4  |
| <b>Figure S3.</b> Rietveld refinement profiles for the PXRD data of the complex <b>2</b> .....        | Page S4  |
| <b>Figure S4.</b> Rietveld refinement profiles for the PXRD data of the complex <b>3</b> .....        | Page S4  |
| <b>Figure S5.</b> Rietveld refinement profiles for the PXRD data of the complex <b>4</b> .....        | Page S5  |
| <b>Figure S6.</b> Rietveld refinement profiles for the PXRD data of the complex <b>5</b> .....        | Page S5  |
| <b>Figure S7.</b> Rietveld refinement profiles for the PXRD data of the complex <b>6</b> .....        | Page S6  |
| <b>Figure S8.</b> Frontier molecular orbitals (HOMO and LUMO) of the free ligand .....                | Page S6  |
| <b>Figure S9.</b> Frontier molecular orbitals HOMO, LUMO and Spin Density of the <b>1</b> ...         | Page S7  |
| <b>Figure S10.</b> Frontier molecular orbitals HOMO, LUMO and Spin Density of the <b>2</b> ..         | Page S8  |
| <b>Figure S11.</b> Frontier molecular orbitals HOMO, LUMO and Spin Density of the <b>3</b> ...        | Page S9  |
| <b>Figure S12.</b> Frontier molecular orbitals HOMO, LUMO and Spin Density of the <b>4</b> ...        | Page S10 |
| <b>Figure S13.</b> Frontier molecular orbitals HOMO, LUMO of the <b>5</b> .....                       | Page S11 |
| <b>Figure S14.</b> Frontier molecular orbitals HOMO, LUMO and Spin Density of the <b>6</b> ...        | Page S12 |
| <b>Figure S15.</b> Computed electron density maps for complexes <b>1, 2, 3, 4,</b> and <b>5</b> ..... | Page S13 |
| <b>Figure S16.</b> Additional TEM images .....                                                        | Page S14 |
| <b>Table S1.</b> Selected bond lengths (Å) and angles (°) for the complex <b>1</b> .....              | Page S15 |
| <b>Table S2.</b> Selected bond lengths (Å) and angles (°) for the complex <b>2</b> .....              | Page S15 |

|                                                                                                     |             |
|-----------------------------------------------------------------------------------------------------|-------------|
| <b>Table S3.</b> Selected bond lengths (Å) and angles (°) for the complex <b>3</b> .....            | Page S16    |
| <b>Table S4.</b> Selected bond lengths (Å) and angles (°) for the complex <b>4</b> .....            | Page S16    |
| <b>Table S5.</b> Selected bond lengths (Å) and angles (°) for the complex <b>5</b> .....            | Page S17    |
| <b>Table S6.</b> Selected bond lengths (Å) and angles (°) for the complex <b>6</b> .....            | Page S17    |
| <b>Table S7.</b> Optimized Coordinates and Absolute Energy for Free Ligand (H <sub>2</sub> L) ..... | Page S18    |
| <b>Table S8.</b> Optimized Coordinates and Absolute Energy for Complex <b>1</b> .....               | Page S19    |
| <b>Table S9.</b> Optimized Coordinates and Absolute Energy for Complex <b>2</b> .....               | Page S20-21 |
| <b>Table S10.</b> Optimized Coordinates and Absolute Energy for Complex <b>3</b> .....              | Page S21-22 |
| <b>Table S11.</b> Optimized Coordinates and Absolute Energy for Complex <b>4</b> .....              | Page S22-23 |
| <b>Table S12.</b> Optimized Coordinates and Absolute Energy for Complex <b>5</b> .....              | Page S24-25 |
| <b>Table S13.</b> Optimized Coordinates and Absolute Energy for Complex <b>6</b> .....              | Page S25-27 |
| <b>S1.</b> Extended Experimental and Computational Details .....                                    | Page S27    |
| <b>S1.1.</b> Structure Determination from Powder Data (SDPD) and Rietveld Refinement.               | Page S27    |
| <b>S1.2.</b> Computational Details .....                                                            | Page S27    |
| <b>References</b> .....                                                                             | Page S29    |

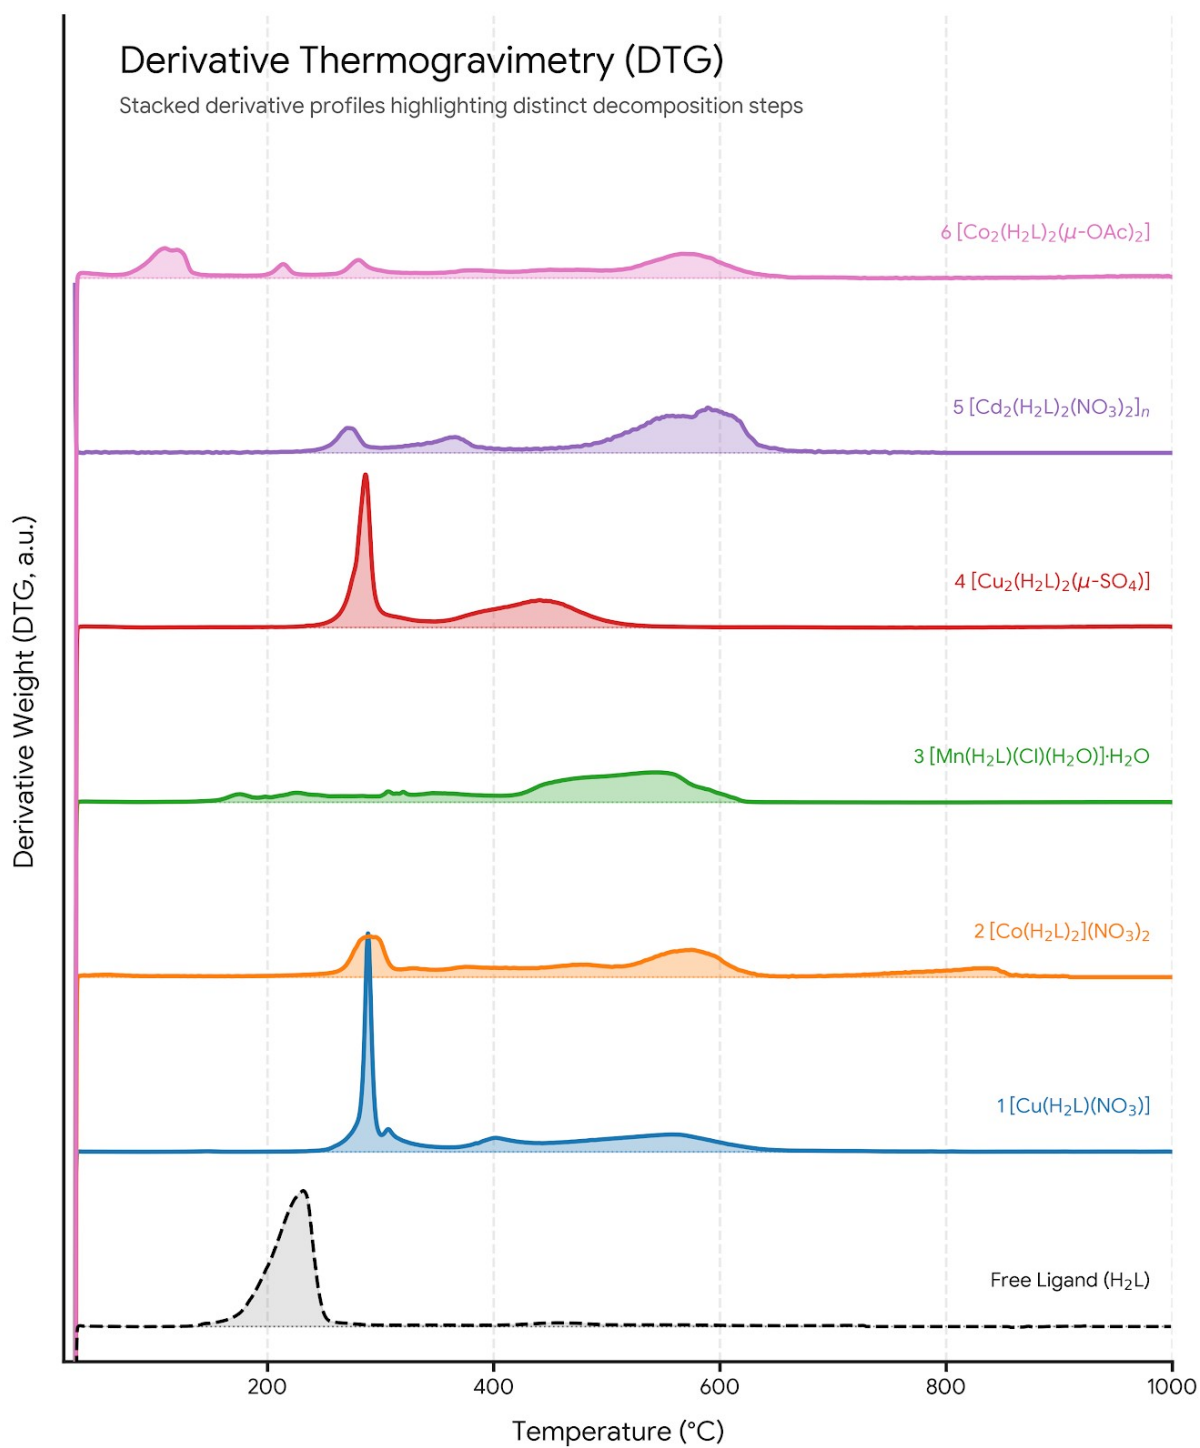

**Figure S1.** DTG curves of the free ligand and complexes **1–6**

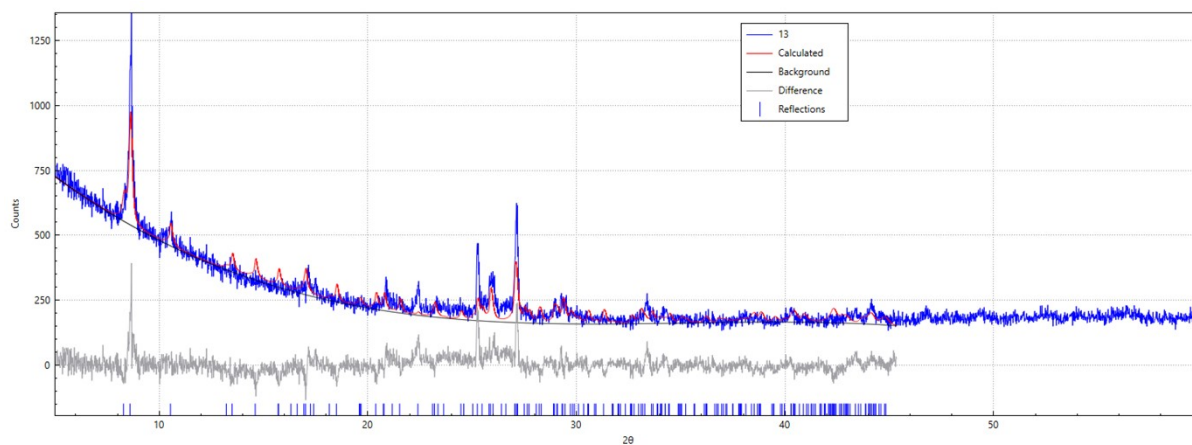

**Figure S2.** Rietveld refinement profiles for the PXRD data of the complex 1

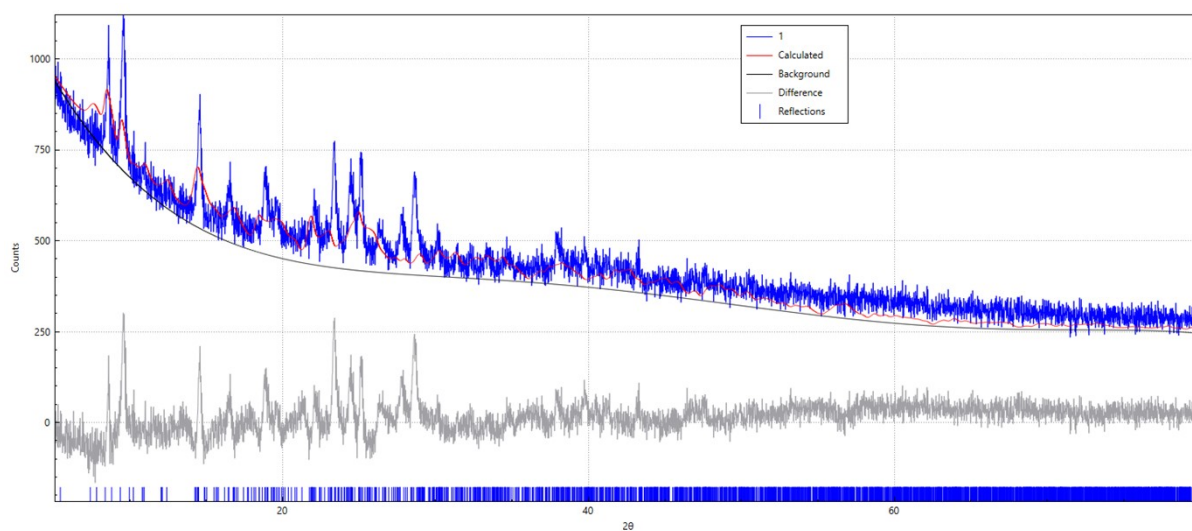

**Figure S3.** Rietveld refinement profiles for the PXRD data of the complex 2

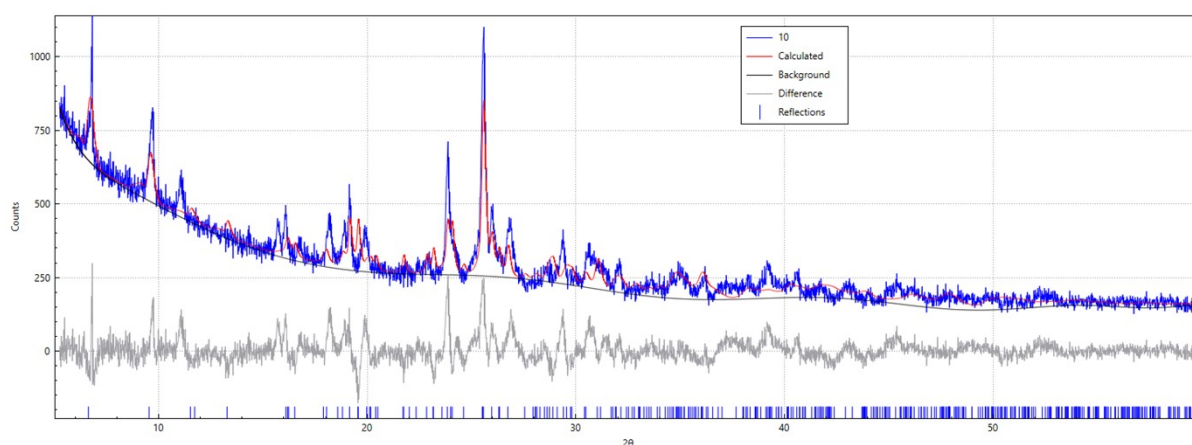

**Figure S4.** Rietveld refinement profiles for the PXRD data of the complex 3

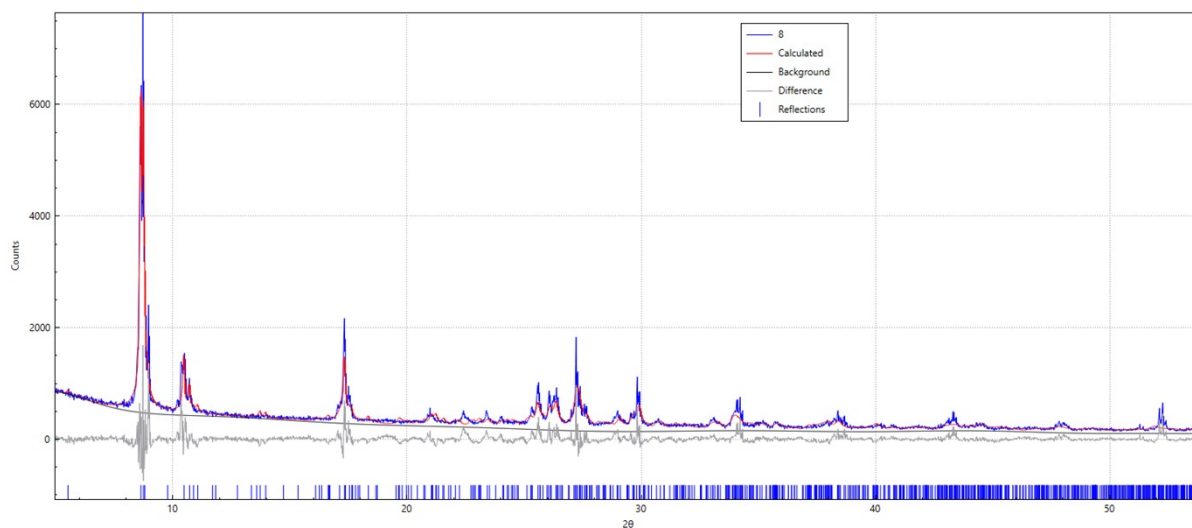

**Figure S5.** Rietveld refinement profiles for the PXRD data of the complex 4

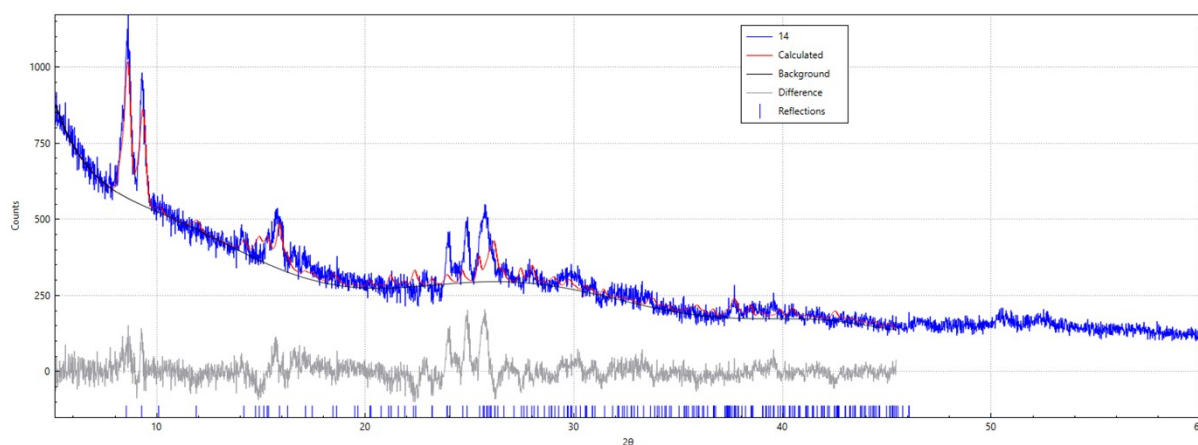

**Figure S6.** Rietveld refinement profiles for the PXRD data of the complex 5

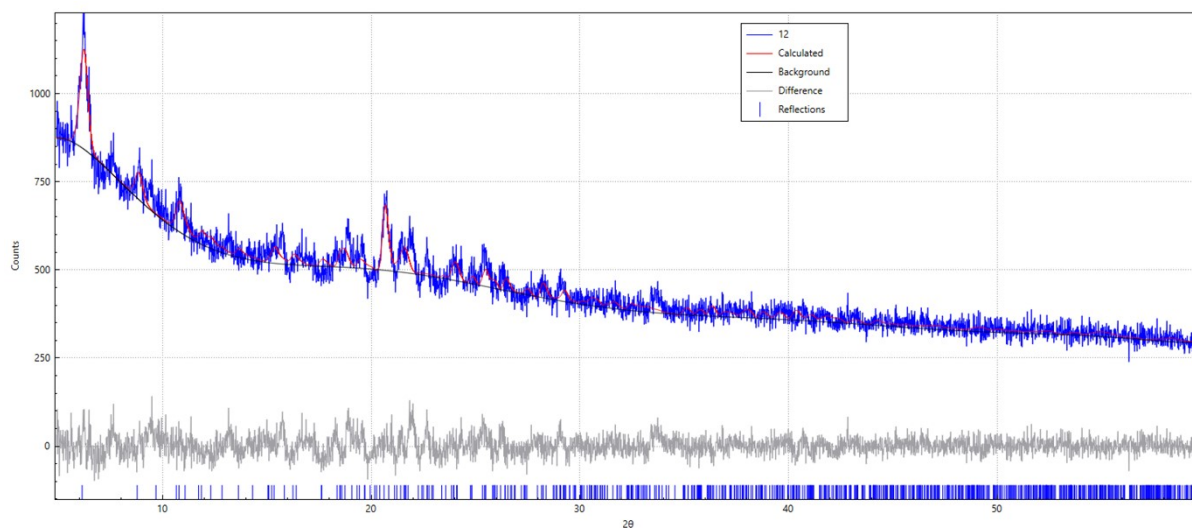

**Figure S7.** Rietveld refinement profiles for the PXRD data of the complex 6

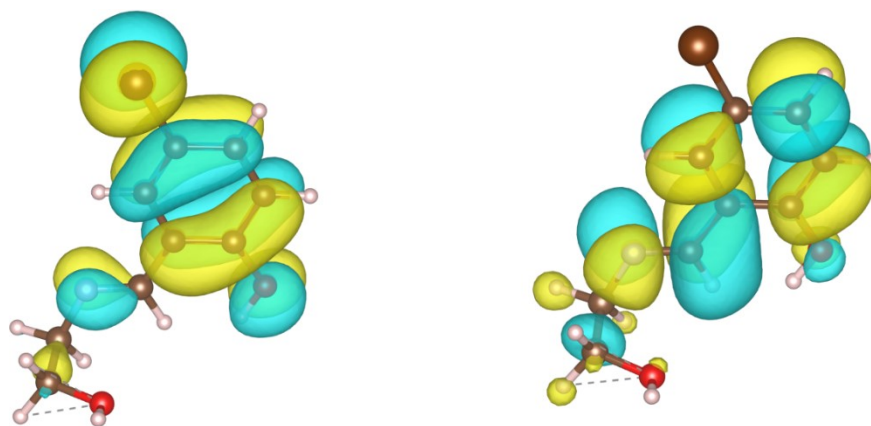

**Figure S8.** Frontier molecular orbitals (HOMO (left) and LUMO (right)) of the free ligand. The isodensity value is set to 0.02 a.u.

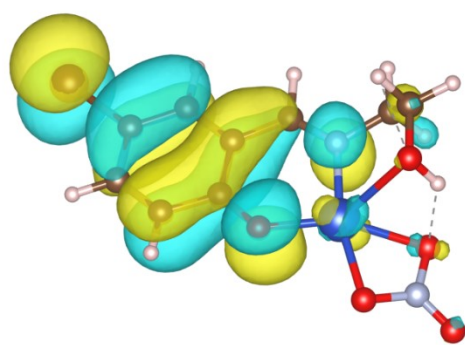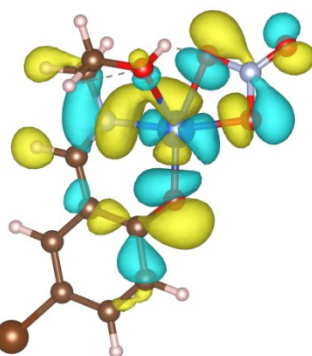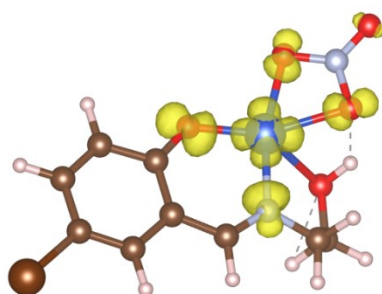

**Figure S9.** Frontier molecular orbitals (HOMO, LUMO) and spin density; from top to bottom, of the **1**. The isodensity value is set to 0.02 a.u.

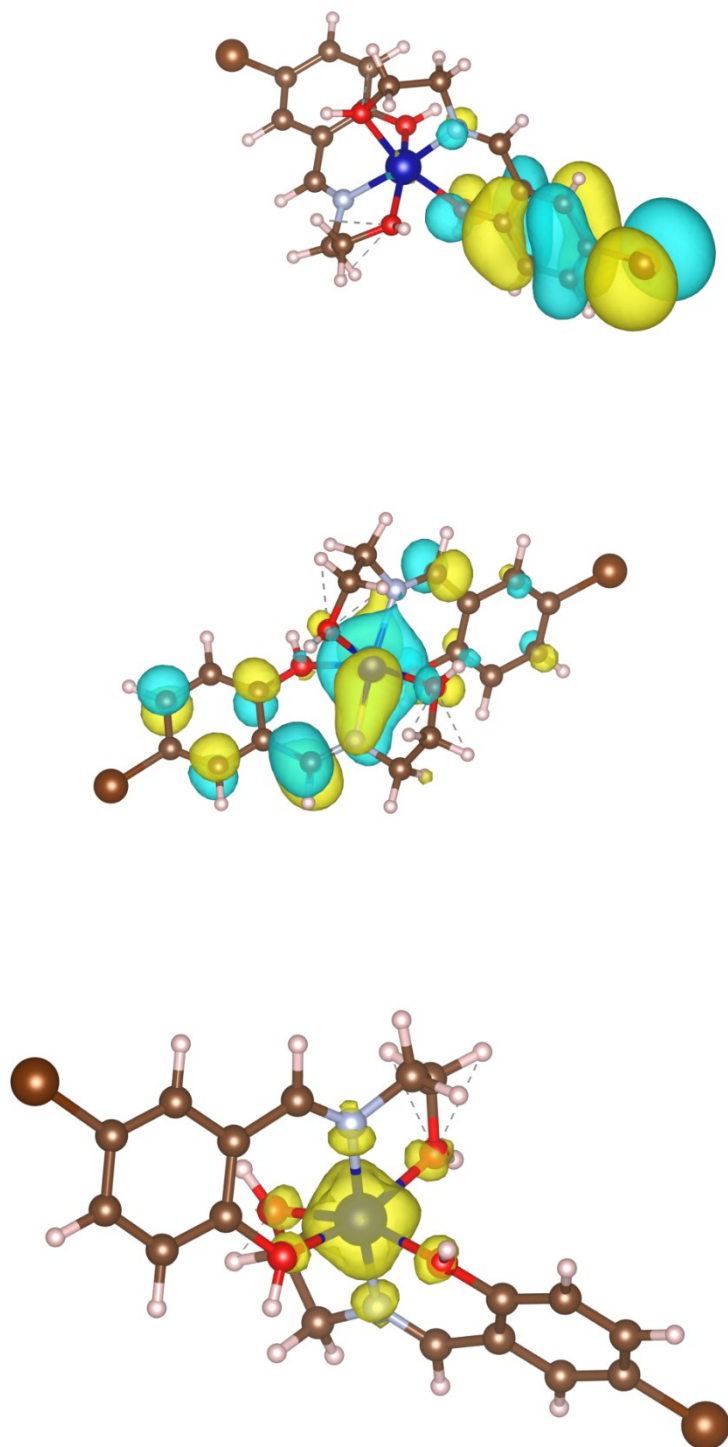

**Figure S10.** Frontier molecular orbitals (HOMO, LUMO) and spin density; from top to bottom, of the **2**. The isodensity value is set to 0.02 a.u.

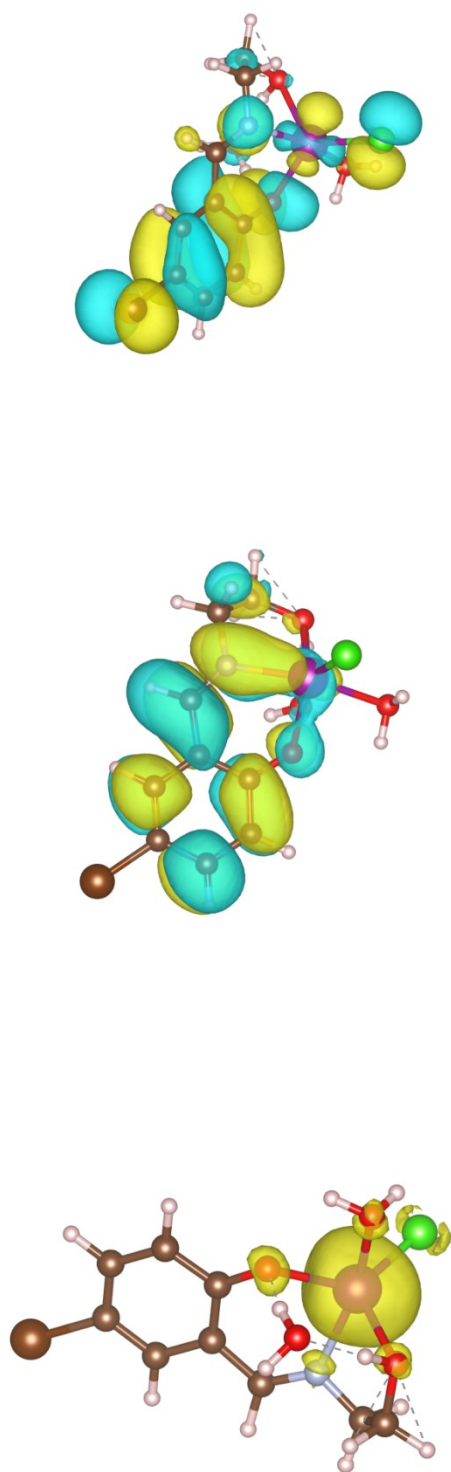

**Figure S11.** Frontier molecular orbitals (HOMO, LUMO) and spin density; from top to bottom, of the **3**. The isodensity value is set to 0.02 a.u.

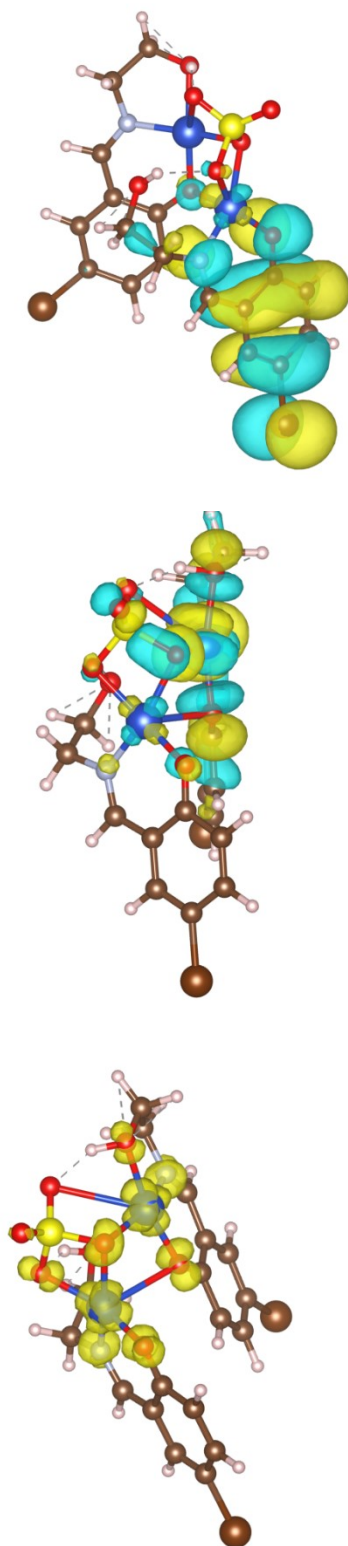

**Figure S12.** Frontier molecular orbitals (HOMO, LUMO) and spin density; from top to bottom, of the 4. The isodensity value is set to 0.02 a.u.

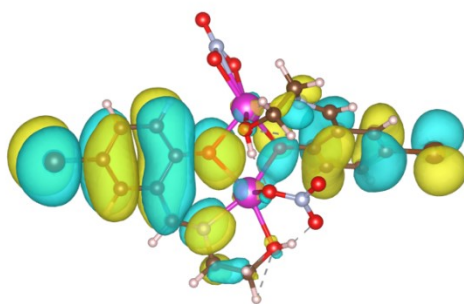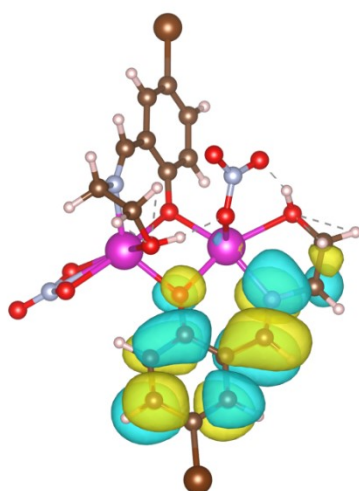

**Figure S13.** Frontier molecular orbitals (HOMO, LUMO ; from top to bottom) of the **5**. The isodensity value is set to 0.02 a.u

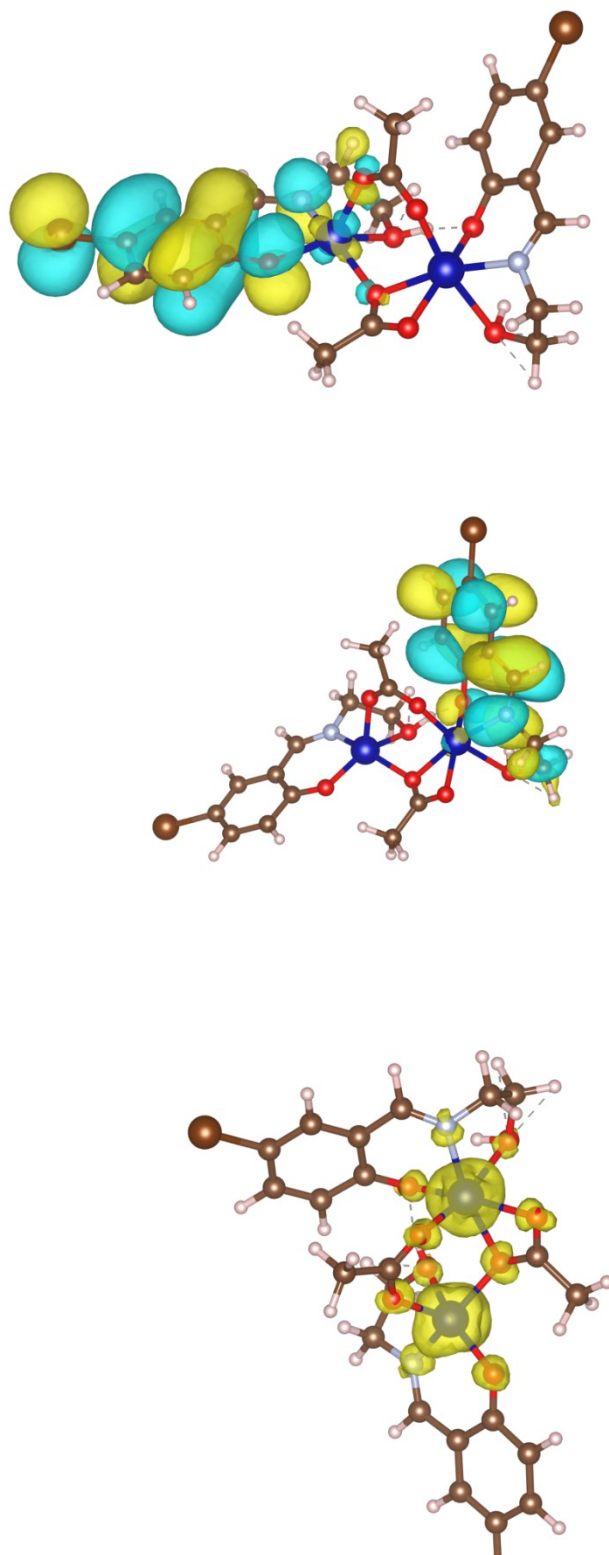

**Figure S14.** Frontier molecular orbitals (HOMO, LUMO) and spin density; from top to bottom, of the **6**. The isodensity value is set to 0.02 a.u.

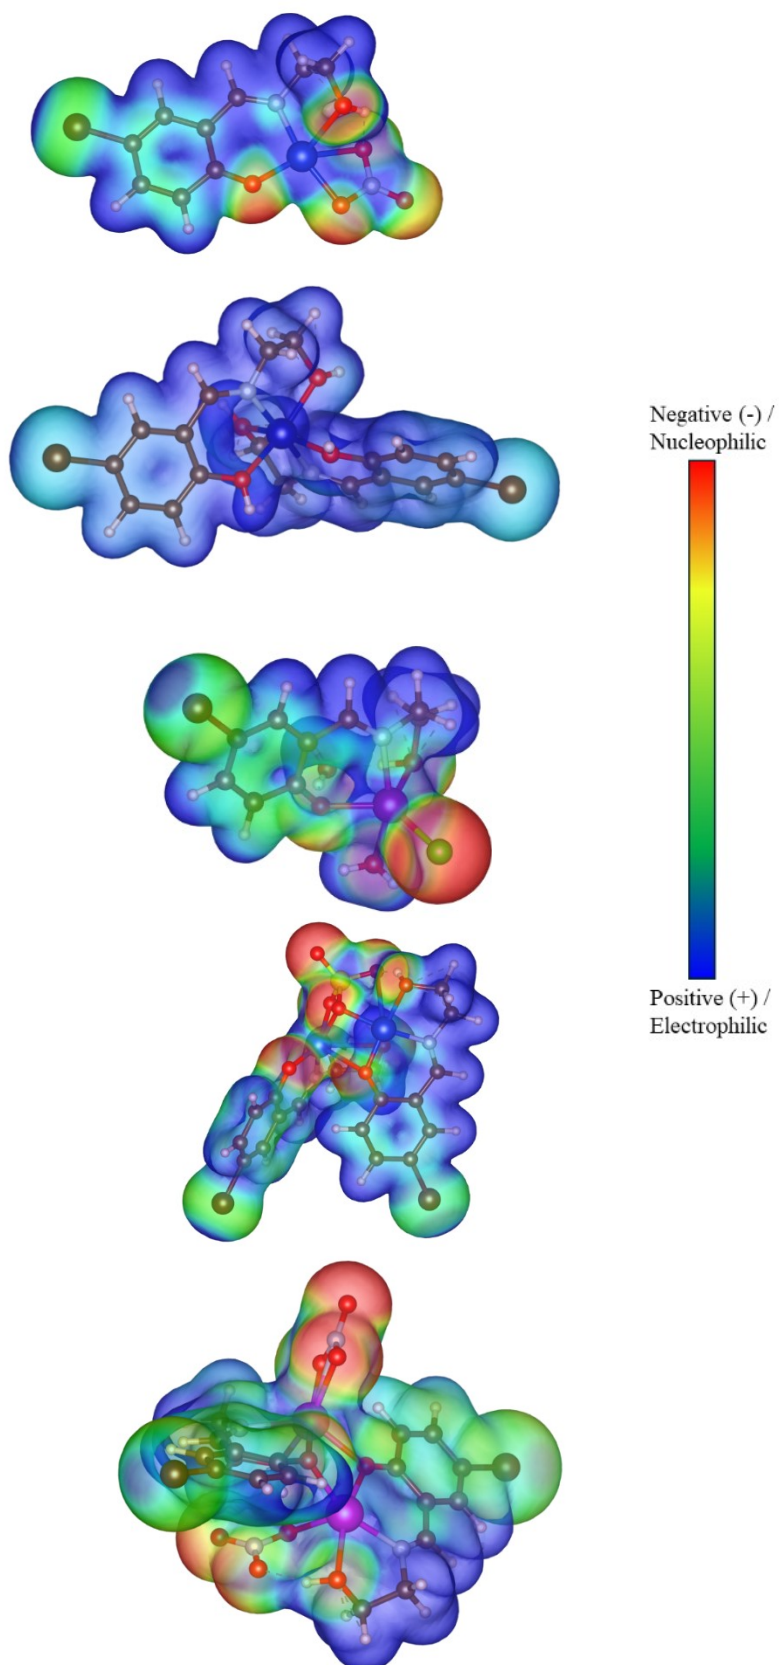

**Figure S15.** Computed electron density (or Molecular Electrostatic Potential) maps for complexes **1**, **2**, **3**, **4**, and **5**; from top to bottom. The accompanying color scale illustrates the electrostatic potential trend, ranging from negative (nucleophilic) regions in red to positive (electrophilic) regions in blue, with the local surface potentials mapped in kcal/mol. (*Note: The corresponding maps for the free ligand and complex 6 are discussed and provided in the main text.*)

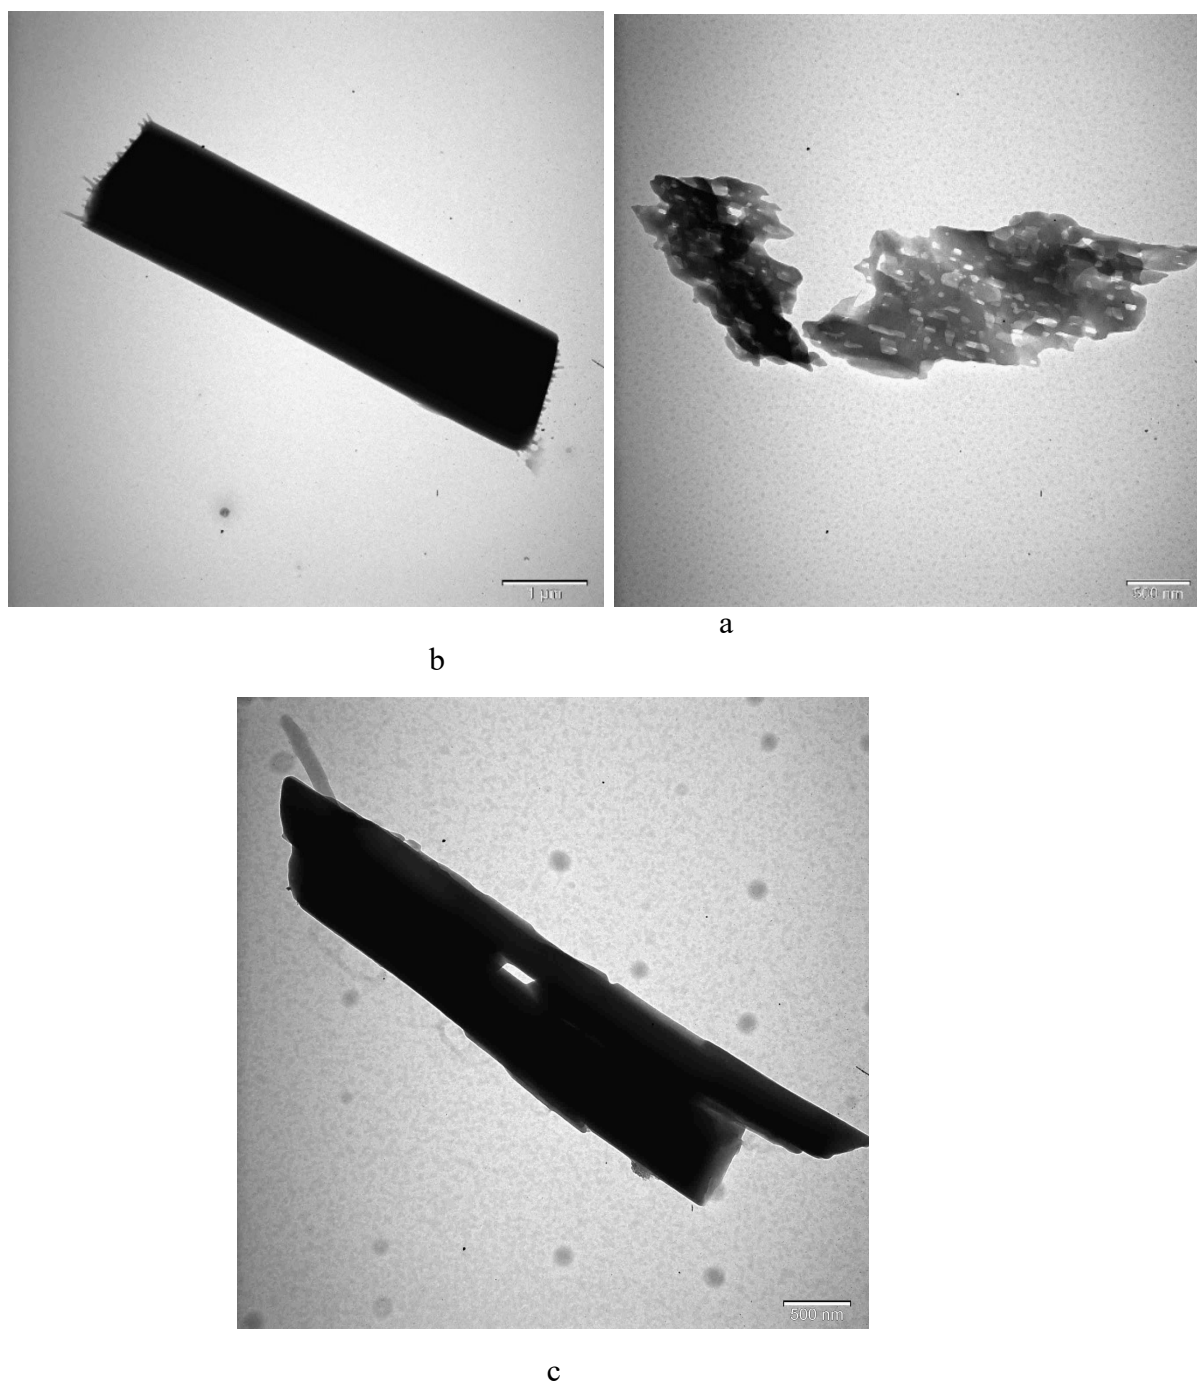

**Figure S16.** Additional TEM images highlighting the morphological heterogeneity and polymorphism in selected coordination complexes (e.g., varying aggregate networks in complex 4 (a) and detailed internal voids in complex 3 (b) and 6 (c))

**Table S1.** Selected bond lengths (Å) and angles (°) for the complex **1**

| <b>Bond Lengths (Å)</b> |          | <b>Bond Angles (°)</b> |        |
|-------------------------|----------|------------------------|--------|
| Cu1 – N1                | 1.945232 | N1 – Cu1 – O1          | 74.89  |
| Cu1 – O1                | 2.556177 | N1 – Cu1 – O2          | 94.71  |
| Cu1 – O2                | 1.877715 | N1 – Cu1 – O4          | 164.69 |
| Cu1 – O4                | 2.031633 | N1 – Cu1 – O5          | 103.94 |
| Cu1 – O5                | 2.170073 | O1 – Cu1 – O2          | 129.16 |
|                         |          | O1 – Cu1 – O4          | 99.15  |
|                         |          | O1 – Cu1 – O5          | 70.34  |
|                         |          | O2 – Cu1 – O4          | 99.84  |
|                         |          | O2 – Cu1 – O5          | 156.67 |
|                         |          | O4 – Cu1 – O5          | 60.79  |
|                         |          | <i>(bite)</i>          |        |

**Table S2.** Selected bond lengths (Å) and angles (°) for the complex **2**

| <b>Bond Lengths (Å)</b> |          | <b>Bond Angles (°)</b> |        |
|-------------------------|----------|------------------------|--------|
| Co1 – N1                | 1.887563 | N1 – Co1 – O1          | 91.05  |
| Co1 – N2                | 1.889258 | N1 – Co1 – O2          | 91.94  |
| Co1 – O1                | 1.843560 | N1 – Co1 – O3          | 92.40  |
| Co1 – O2                | 1.860395 | N1 – Co1 – O4          | 86.39  |
| Co1 – O3                | 1.844025 | N1 – Co1 – N2          | 179.58 |
| Co1 – O4                | 1.878827 | <i>(trans)</i>         |        |
|                         |          | N2 – Co1 – O1          | 89.22  |
|                         |          | N2 – Co1 – O2          | 88.41  |
|                         |          | N2 – Co1 – O4          | 93.35  |
|                         |          | O2 – Co1 – O3          | 175.60 |
|                         |          | <i>(trans)</i>         |        |
|                         |          | O2 – Co1 – O4          | 94.51  |
|                         |          | O1 – Co1 – O2          | 83.46  |
|                         |          | O1 – Co1 – O3          | 95.80  |
|                         |          | O1 – Co1 – O4          | 176.68 |
|                         |          | <i>(trans)</i>         |        |
|                         |          | O3 – Co1 – N2          | 87.25  |
|                         |          | O1 – Co1 – O4          | 86.43  |

**Table S3.** Selected bond lengths (Å) and angles (°) for the complex **3**

| Bond Lengths (Å)               |        | Bond Angles (°) |        |
|--------------------------------|--------|-----------------|--------|
| Mn1 – N1                       | 2.1649 | N1 – Mn1 – O1   | 73.84  |
| Mn1 – Cl1                      | 2.3003 | N1 – Mn1 – O2   | 83.08  |
| Mn1 – O1                       | 2.2815 | N1 – Mn1 – O3   | 152.39 |
| Mn1 – O2                       | 2.0938 | O2 – Mn1 – O3   | 78.97  |
| Mn1 – O3<br>(coordinate water) | 2.2588 | O1 – Mn1 – O2   | 110.83 |
| Mn1 – O4<br>(Lattice Water)    | 4.5806 | O1 – Mn1 – O3   | 93.14  |
| Cl1 – H13<br>(Lattice Water)   | 3.0857 | Cl1 – Mn1 – N1  | 120.9  |
|                                |        | Cl1 – Mn1 – O2  | 126.96 |
|                                |        | Cl1 – Mn1 – O3  | 86.71  |
|                                |        | Cl1 – Mn1 – O1  | 120.81 |

**Table S4.** Selected bond lengths (Å) and angles (°) for the complex **4**

| Bond Lengths (Å)                 |       | Bond Angles (°) |        |
|----------------------------------|-------|-----------------|--------|
| <b>Metal 1 (Cu1) Environment</b> |       |                 |        |
| Cu1 – O1                         | 1.846 | O1 – Cu1 – O6 = | 148.01 |
| Cu1 – N1                         | 1.957 | N1 – Cu1 – O7 = | 159.62 |
| Cu1 – O6                         | 1.981 | O1 – Cu1 – N1 = | 96.65  |
| Cu1 – O7<br>(sulfate/bridge)     | 2.070 | O6 – Cu1 – O7 = | 70.91  |
| Cu1 – O2<br>(bridge)             | 2.523 | O1 – Cu1 – O2 = | 86.93  |
| <b>Metal 2 (Cu2) Environment</b> |       |                 |        |
| Cu2 – O2<br>(bridge)             | 1.842 | O2 – Cu2 – O3 = | 166.99 |
| Cu2 – N2                         | 1.945 | N2 – Cu2 – O7 = | 159.12 |
| Cu2 – O7<br>(sulfate/bridge)     | 1.991 | O2 – Cu2 – N2 = | 94.58  |
| Cu2 – O3                         | 2.020 | O3 – Cu2 – O7 = | 94.56  |
| Cu2 – O4                         | 2.719 | O4 – Cu2 – O7 = | 59.13  |

**Table S5.** Selected bond lengths (Å) and angles (°) for the complex **5**

| Bond Lengths (Å)                 |       | Bond Angles (°)                 |        |
|----------------------------------|-------|---------------------------------|--------|
| <b>Metal 1 (Cd1) Environment</b> |       |                                 |        |
| N1 – Cd1                         | 2.268 | O2 – Cd1 – O6                   | 158.33 |
| O1 – Cd1                         | 2.485 | O1 – Cd1 – O5                   | 148.49 |
| Cd1 – O2<br>(bridge)             | 2.332 | N1 – Cd1 – O4                   | 136.21 |
| Cd1 – O4<br>(bridge)             | 2.255 | N1 – Cd1 – O5                   | 113.35 |
| Cd1 – O5<br>(nitrate)            | 2.314 | O2 – Cd1 – O4                   | 77.67  |
| Cd1 – O6<br>(nitrate)            | 2.322 | O5 – Cd1 – O6<br>(nitrate bite) | 55.86  |
| <b>Metal 2 (Cd2) Environment</b> |       |                                 |        |
| Cd2 – O2<br>(bridge) =           | 2.156 | O2 – Cd2 – N2 =                 | 157.50 |
| Cd2 – N2 =                       | 2.218 | O3 – Cd2 – O4 =                 | 158.32 |
| Cd2 – O4<br>(bridge) =           | 2.235 | O2 – Cd2 – O3 =                 | 119.65 |
| Cd2 – O9<br>(nitrate)            | 2.328 | N2 – Cd2 – O9 =                 | 108.67 |
| Cd2 – O3 =                       | 2.349 | O2 – Cd2 – O4 =                 | 81.85  |

**Table S6.** Selected bond lengths (Å) and angles (°) for the complex **6**

| Bond Lengths (Å)                 |       | Bond Angles (°)                    |        |
|----------------------------------|-------|------------------------------------|--------|
| <b>Metal 1 (Co1) Environment</b> |       |                                    |        |
| Co1 – N1                         | 2.064 | N1 – Co1 – O6 =                    | 166.87 |
| Co1 – O7                         | 2.017 | O2 – Co1 – O5 =                    | 159.89 |
| Co1 – O2                         | 2.107 | N1 – Co1 – O2 =                    | 82.48  |
| Co1 – O6<br>(bridge)             | 2.131 | O5 – Co1 – O6 =<br>(bite)          | 61.26  |
| Co1 – O5                         | 2.141 |                                    |        |
| <b>Metal 2 (Co2) Environment</b> |       |                                    |        |
| Co2 – O4 =                       | 1.961 | N2 – Co2 – O6 =                    | 153.15 |
| Co2 – O8 =                       | 2.019 | O3 – Co2 – O4 =                    | 149.47 |
| Co2 – N2 =                       | 2.027 | Co1 – O6 – Co2 =<br>(bridge angle) | 112.42 |
| Co2 – O6<br>(bridge) =           | 2.072 | N2 – Co2 – O3 =                    | 78.18  |
| Co2 – O3 =                       | 2.171 |                                    |        |

**Table S7. Optimized Coordinates and absolute energy for Free Ligand (H<sub>2</sub>L)**

Absolute Energy: -3127.199277 Hartree

|    |                   |                   |                   |
|----|-------------------|-------------------|-------------------|
| O  | 1.16133958047698  | -0.98274860062046 | 2.40256248825989  |
| C  | 1.65304798133162  | -0.25143102700325 | 1.37370890772556  |
| C  | 2.91361887764987  | 0.33682893136122  | 1.56576191002567  |
| C  | 3.49199362483983  | 1.11669333907756  | 0.57137035094177  |
| C  | 2.80537800472610  | 1.31997175376646  | -0.63532007664162 |
| Br | 3.59831329513099  | 2.39757275785389  | -1.99672277841118 |
| C  | 1.56191068503111  | 0.74298729027003  | -0.84433440998889 |
| C  | 0.96865793669250  | -0.05748946565083 | 0.15172681456240  |
| C  | -0.33711938391402 | -0.68188032771790 | -0.10371498539051 |
| N  | -1.01913114040248 | -0.46299082551663 | -1.15502359698105 |
| C  | -2.31975473121969 | -1.08008506778193 | -1.26069393049289 |
| C  | -3.39956481732001 | -0.13155334369152 | -0.74628197616158 |
| O  | -3.24105732151010 | -0.00394179955645 | 0.65253736972740  |
| H  | 0.25910416043170  | -1.27101133253933 | 2.21248400768674  |
| H  | 3.42240081890925  | 0.17004876952901  | 2.51704134368698  |
| H  | 4.47146478631292  | 1.57140450684760  | 0.72857144482702  |
| H  | 1.01124847800000  | 0.88249185308348  | -1.77520228536946 |
| H  | -0.72313085288131 | -1.38237954645849 | 0.66698890898562  |
| H  | -2.39333208863751 | -2.02300548481115 | -0.68015212261866 |
| H  | -2.52957338030990 | -1.31306021665848 | -2.31785126923604 |
| H  | -3.29194808319284 | 0.84147511410078  | -1.26210687318699 |
| H  | -4.39372407173239 | -0.54776868615478 | -1.00724473008550 |
| H  | -3.67013835841262 | 0.80986940827117  | 0.94189648813532  |

**Table S8.** Optimized Coordinates and absolute energy for Complex 1

Absolute Energy: -5046.886378 Hartree

|    |                   |                   |                   |
|----|-------------------|-------------------|-------------------|
| Br | -8.32152201615177 | -2.28065500840643 | 3.14595121738320  |
| C  | -7.25505520417251 | -1.17275105264832 | 2.00257990702719  |
| H  | 0.23889159901654  | -0.60228288929091 | -0.50118704278792 |
| C  | -5.88581441472552 | -1.15489294031815 | 2.12631971226608  |
| C  | -7.87630534109075 | -0.37146729256230 | 1.01710631253621  |
| H  | -5.40094064235656 | -1.77889689676657 | 2.88103470514518  |
| H  | -8.96199426381624 | -0.39194803759135 | 0.91893353553959  |
| C  | -5.08265355311508 | -0.33802468669896 | 1.27418308956561  |
| C  | -7.11874838892497 | 0.42520202190446  | 0.17827438763050  |
| C  | -0.85646185594359 | -0.45206573140465 | -0.52588657384785 |
| H  | -0.83967133996480 | 1.29622968008129  | -1.39012197343369 |
| C  | -5.69595177268264 | 0.47594335173612  | 0.26934367522230  |
| C  | -3.66071947730463 | -0.41027698736617 | 1.41509407544435  |
| H  | -3.29155129108025 | -1.16065874902814 | 2.13517323129842  |
| H  | -7.58913843763610 | 1.03929468848061  | -0.59218032681654 |
| Cu | -3.23539166682394 | 1.67650441228819  | -0.52642518619168 |
| N  | -2.75783128706787 | 0.31096375076251  | 0.77402189217131  |
| O  | -1.24675129312180 | 0.44307155591569  | -1.55501307428880 |
| H  | -1.32609230999327 | -1.41830508146413 | -0.75393538892838 |
| O  | -5.05770804189206 | 1.22514439528049  | -0.56183123501958 |
| H  | -0.79387012151733 | 0.94679072570628  | 1.13736728601118  |
| C  | -1.33492364176796 | 0.02501995628671  | 0.85851556559993  |
| H  | -1.12150441542596 | -0.74464970670880 | 1.62848914839162  |
| N  | -2.10990003881730 | 3.72195765511045  | -1.47699950400815 |
| O  | -1.65572307900174 | 4.67269336690961  | -2.01929764810279 |
| O  | -3.25940908217815 | 3.31219436256638  | -1.73119670136725 |
| O  | -1.50586862244335 | 2.98655513722606  | -0.56800308644011 |

**Table S9. Optimized coordinates and absolute energy for Complex 2**

Absolute Energy: -7636.582672 Hartree

|    |                   |                   |                   |
|----|-------------------|-------------------|-------------------|
| Br | 4.46208637256572  | 0.30529916534864  | 0.39715607639925  |
| O  | -0.99215605796298 | 0.38414526453005  | 3.06822536068631  |
| N  | -2.04699732734653 | 0.52683042641958  | 0.44149021251543  |
| C  | 0.25015660228811  | 0.38690477871643  | 2.45251766407166  |
| C  | 1.40537013120767  | 0.37937139004122  | 3.22695524868536  |
| C  | 2.66310145031652  | 0.35758941492243  | 2.62059613319370  |
| C  | 2.76795866919625  | 0.33806421991843  | 1.22243314718491  |
| C  | 1.60925842319079  | 0.33248152511113  | 0.44803249329621  |
| C  | 0.32608386936246  | 0.36501011308555  | 1.03985598396556  |
| C  | -0.81085455096815 | 0.33058390287851  | 0.13250529741053  |
| C  | -3.08560102751511 | 0.41051930771407  | -0.58318517248486 |
| C  | -4.09712139634338 | 1.53100436408936  | -0.40124306643285 |
| H  | 1.33348278831801  | 0.38779059565757  | 4.31858779880293  |
| H  | 3.56363567781330  | 0.35253480532955  | 3.23754726267760  |
| H  | 1.69174585521319  | 0.30016811411489  | -0.64040139977410 |
| H  | -0.55508727684955 | 0.11382547635415  | -0.91765908087217 |
| H  | -3.59817491652298 | -0.55790907026368 | -0.44786386487893 |
| H  | -2.67017481029883 | 0.42981404787496  | -1.60464181184300 |
| H  | -3.65619971582791 | 2.51028559192808  | -0.65603987956887 |
| H  | -4.97998240569554 | 1.36222567991692  | -1.03589909948230 |
| H  | -3.31960565852328 | 4.55659034177633  | 2.65705962145740  |
| C  | -2.38567698518122 | 4.08987097995348  | 3.01424131299550  |
| C  | -4.44754968782694 | 1.81568229167509  | 4.70711193745213  |
| H  | -4.73214034161012 | 2.49357560935981  | 5.52871424516536  |
| C  | -6.53146660899696 | 0.67100964916063  | 5.26025133641492  |
| C  | -5.31769459140930 | 0.66386900846823  | 4.53554864052247  |
| O  | -1.90785769652142 | 3.14652473311686  | 2.03142970591246  |
| Br | -9.05938753721180 | -0.32829265373594 | 6.12975323473682  |
| H  | -1.63490993385607 | 4.87628377263582  | 3.18485317169319  |
| C  | -5.03737004835299 | -0.45733730539219 | 3.71878627694492  |
| C  | -7.44359788372332 | -0.37765229745627 | 5.16000105823360  |
| O  | -3.83073944381235 | -0.52246838854114 | 3.04497267054474  |
| H  | -6.75826656794458 | 1.51984036479246  | 5.90880398315343  |
| C  | -5.94474005530156 | -1.50787448102931 | 3.62481506285030  |

|    |                   |                   |                  |
|----|-------------------|-------------------|------------------|
| C  | -7.14553602816536 | -1.47322205937412 | 4.33708028873207 |
| H  | -5.71696065283067 | -2.37456028984679 | 2.99693285732847 |
| H  | -7.84831905544976 | -2.30473761947794 | 4.25680523633880 |
| C  | -2.62564331599388 | 3.30048606476134  | 4.29295604650383 |
| H  | -3.10841583425400 | 3.94287794558680  | 5.04828482785327 |
| N  | -3.41595747705714 | 2.10710516738047  | 3.99060741731370 |
| H  | -1.65223749910390 | 2.97634776418916  | 4.70027993583675 |
| Co | -2.77211344612848 | 1.19462682548531  | 2.25272101924818 |
| H  | -3.73029981326972 | -1.39302956886166 | 2.62863065726944 |
| H  | -0.91268848019592 | 0.15159244949107  | 4.00718302433337 |
| H  | -1.60303083919914 | 3.59695825610523  | 1.23036980050083 |
| O  | -4.46896876628292 | 1.51101847453725  | 0.99131705654768 |
| H  | -5.25055610593798 | 2.05639585155210  | 1.16193027056381 |

**Table S10.** Optimized coordinates and absolute energy for Complex 3

Absolute Energy: -4890.279650 Hartree

|    |                   |                   |                   |
|----|-------------------|-------------------|-------------------|
| C  | -0.79472645557992 | 0.57501577809819  | -3.63911677583564 |
| C  | 0.46679414569042  | 0.93457146337147  | -3.09418841377894 |
| C  | 1.58533807975385  | 1.13499550803413  | -3.88675215138181 |
| C  | 1.49048214880727  | 1.00070730782065  | -5.28391367933429 |
| Br | 3.02992392899830  | 1.29166760094703  | -6.37141865465274 |
| C  | 0.27914786779636  | 0.66615584733769  | -5.86312951982734 |
| C  | -0.86886723111399 | 0.43263621283782  | -5.07011991741974 |
| C  | -2.10555156806908 | 0.13242459981070  | -5.76535833509474 |
| N  | -3.17510282664682 | -0.31531796970178 | -5.21082512311548 |
| C  | -4.44126313521868 | -0.39147917370473 | -5.90483040800413 |
| C  | -5.40238041902370 | 0.57915057637719  | -5.19547034489444 |
| O  | -5.30323373748178 | 0.43654401531681  | -3.78043772224111 |
| H  | 0.52740550400039  | 1.04440441721368  | -2.00930025163884 |
| H  | 2.54138239758202  | 1.40204564566197  | -3.43187696615126 |
| H  | 0.20266138947193  | 0.57170924590651  | -6.94896426361042 |
| H  | -2.10509703538089 | 0.32647854565603  | -6.85521362960143 |
| H  | -4.82965119030557 | -1.42130255018969 | -5.81460412773132 |
| H  | -4.36725431923655 | -0.14116412817478 | -6.98021306879952 |
| H  | -5.14230291489436 | 1.61398346272518  | -5.47768084851605 |
| H  | -6.44043113832306 | 0.38726135706985  | -5.51327472074456 |
| H  | -4.92024103806818 | 1.28229949386799  | -3.42387652735112 |
| Mn | -3.49928926201521 | -0.79602166259181 | -3.12481792088274 |

|    |                   |                   |                   |
|----|-------------------|-------------------|-------------------|
| O  | -1.82372846122433 | 0.42788737472066  | -2.84397739331938 |
| Cl | -3.74851185616129 | -2.97829787191457 | -2.43934502067337 |
| O  | -3.74037909225903 | -0.22460648323204 | -0.95280120691729 |
| O  | -3.70839643547933 | 2.40458534158287  | -3.01653313794967 |
| H  | -3.79997590601299 | -1.16427794234130 | -0.69128273216686 |
| H  | -2.81806149060273 | 0.03191944507855  | -0.78444543541402 |
| H  | -2.92001613455444 | 1.83423341205153  | -2.84394026549142 |
| H  | -3.40477135874831 | 3.05384796366415  | -3.66475059295976 |

**Table S11.** Optimized coordinates and absolute energy for Complex 4

Absolute Energy: -10232.389038 Hartree

|    |                   |                   |                   |
|----|-------------------|-------------------|-------------------|
| Cu | -6.02066480543136 | 2.10304570813331  | 11.25172768907226 |
| Br | -4.49382996631866 | 9.34434497769466  | 11.31829701255668 |
| O  | -6.66265656012180 | 3.75314969530382  | 10.56841341145121 |
| N  | -4.59759877015229 | 2.88790648457386  | 12.33868943413732 |
| C  | -6.16137266090103 | 4.92155741666449  | 10.76974158317865 |
| C  | -6.73431862362528 | 6.04178461587910  | 10.09159045258876 |
| C  | -6.24989416685554 | 7.32305162302232  | 10.25672196116745 |
| C  | -5.15147827174476 | 7.56550086733914  | 11.11232405169674 |
| C  | -4.56237406991510 | 6.51842377690605  | 11.78846146720474 |
| C  | -5.04073921296996 | 5.18942394951677  | 11.63685446179026 |
| C  | -4.35574905096374 | 4.15944682315372  | 12.36343796289999 |
| C  | -3.79321921977066 | 1.97042872119694  | 13.13214658350105 |
| C  | -2.98876686335871 | 0.99057609645072  | 12.27002907155324 |
| H  | -7.58053916974217 | 5.83948885170573  | 9.43273332601978  |
| H  | -6.71200037331038 | 8.15698414769402  | 9.72422818862791  |
| H  | -3.71300225565794 | 6.70337003058876  | 12.44999690548590 |
| H  | -3.52834008398042 | 4.50553510169383  | 13.00573767679029 |
| H  | -4.47167940465189 | 1.40195283147042  | 13.79043284331035 |
| H  | -3.09061250694018 | 2.53142065114475  | 13.77487426623807 |
| H  | -3.91325480114303 | 4.28772118625585  | 9.35307863854614  |
| H  | -5.34606460597036 | -2.20313642169590 | 6.66392637095160  |
| H  | -1.54545902497435 | 5.02532654796735  | 9.29157137964552  |
| C  | -3.11700351328040 | 3.56898409036241  | 9.16273007054846  |
| C  | -1.79697969163220 | 3.97569219174951  | 9.12644421549741  |
| H  | -6.54351891112823 | -1.89917318775699 | 9.28263397414107  |
| Cu | -5.49799022312995 | 0.16584070197124  | 8.92495459071184  |
| O  | -4.75150773003469 | 1.90346995460608  | 9.05380582644608  |

|    |                   |                   |                   |
|----|-------------------|-------------------|-------------------|
| C  | -3.49182314021726 | 2.21146917630114  | 8.96044894877843  |
| O  | -6.34791430404547 | -1.61776333604587 | 8.33778162209920  |
| C  | -5.35081864893049 | -2.44517962550192 | 7.73779035785247  |
| C  | -0.77180970946070 | 3.03878203035024  | 8.87945617431144  |
| N  | -3.82939508409131 | -0.70455153038689 | 8.42932875992804  |
| Br | 1.04597569858910  | 3.61226892508845  | 8.85510363296676  |
| C  | -2.43944100290966 | 1.27350646479078  | 8.68114396549211  |
| H  | -5.61554792963145 | -3.50828653030310 | 7.85369128597369  |
| C  | -3.98723077141200 | -2.15060115092407 | 8.35875609440755  |
| C  | -1.09099564512815 | 1.71470875549199  | 8.65360838643969  |
| C  | -2.67694024245125 | -0.12681121063693 | 8.46052797657259  |
| H  | -3.17318878845078 | -2.63119960399926 | 7.78720181771937  |
| H  | -0.29928757129258 | 0.98921562947154  | 8.45387657797535  |
| H  | -1.77911829042962 | -0.75072599071809 | 8.31281775497830  |
| H  | -3.96137229132653 | -2.54449336788628 | 9.39103999174272  |
| S  | -7.19345154775253 | -0.34860038308190 | 11.30687483529883 |
| O  | -6.47531177852561 | -1.59923327800454 | 10.88192665279582 |
| O  | -8.58406278467523 | -0.50239283217571 | 11.68359059214010 |
| O  | -6.32639318644103 | 0.39168783635836  | 12.35398632533682 |
| O  | -7.03126661194273 | 0.69612724284332  | 10.08978356792057 |
| O  | -3.77646685666817 | 0.18340179817195  | 11.42811117845133 |
| H  | -2.37229813564442 | 0.37820579316552  | 12.95919398507193 |
| H  | -2.29796604606200 | 1.55330783735489  | 11.62085224750180 |
| H  | -4.55641079339350 | -0.12995008331626 | 11.92566385248253 |

**Table S12.** Optimized coordinates and absolute energy for Complex 5

Absolute Energy: -7148.821884 Hartree

|    |                   |                   |                   |
|----|-------------------|-------------------|-------------------|
| C  | -0.83922663884394 | -0.59560304457574 | -3.09589317047442 |
| C  | 0.40944999872053  | -1.10416955701396 | -2.67106767098753 |
| C  | 1.54722108633511  | -1.02577564706804 | -3.46103405619551 |
| C  | 1.47492983298812  | -0.41536578658611 | -4.72223917551548 |
| Br | 3.03618163512376  | -0.28970372992168 | -5.80738384614955 |
| C  | 0.27129239229603  | 0.10594160483392  | -5.16791096192907 |
| C  | -0.90380009979113 | 0.02011296023652  | -4.38560834430279 |
| C  | -2.08754582144543 | 0.65536059666726  | -4.94734252143364 |
| N  | -3.29887054463239 | 0.53666012744849  | -4.54399789903293 |
| C  | -4.36152854756164 | 1.35574382830684  | -5.09614380524882 |
| C  | -4.81908137421884 | 2.36376848525433  | -4.02304307699273 |
| O  | -4.92121335057520 | 1.74854645538226  | -2.74103744050132 |
| H  | 0.45582066040000  | -1.57651930849801 | -1.68652524305662 |
| H  | 2.49513077089104  | -1.43286311627304 | -3.10436329435857 |
| H  | 0.22283803909379  | 0.59766509380929  | -6.14173124219390 |
| H  | -1.88810507684756 | 1.31365475994351  | -5.81260803939275 |
| H  | -5.20000797408445 | 0.69127433800218  | -5.36609571993876 |
| H  | -4.04343915917730 | 1.90288359734054  | -6.00248698389004 |
| H  | -4.09106583441056 | 3.18553549408081  | -3.97028543163884 |
| H  | -5.80368460131797 | 2.77133514482214  | -4.30494435120090 |
| H  | -4.18275743345558 | 2.09123932505937  | -2.19145092709659 |
| Cd | -4.15881164242205 | -0.61680509983855 | -2.79121716187198 |
| O  | -1.88351779068522 | -0.67978120118917 | -2.28454726515611 |
| Br | -8.75147665890279 | -0.64939695433943 | 3.39451981322856  |
| C  | -7.29041952629101 | -0.56117476339033 | 2.17423581927787  |
| H  | -1.23007098566281 | 2.83558304345199  | 1.54521019515342  |
| C  | -6.03502136310069 | -0.19427832567470 | 2.61398228799352  |
| C  | -7.49255341865780 | -0.86686422094253 | 0.81453576632019  |
| H  | -5.88165986130976 | 0.04892775174097  | 3.66768250599841  |
| H  | -8.48549076171040 | -1.15313681578595 | 0.46241083722133  |
| C  | -4.92704164097590 | -0.12379894558586 | 1.72535096466071  |
| C  | -6.43632391405944 | -0.80367148650423 | -0.07653102197414 |
| C  | -0.59664013515028 | 1.95913186398144  | 1.77099695433517  |
| H  | -0.10071312299570 | 2.00718428812970  | -0.17341462888899 |

|    |                   |                   |                   |
|----|-------------------|-------------------|-------------------|
| C  | -5.12670852587193 | -0.44097139607302 | 0.33486924458564  |
| C  | -3.68772037161588 | 0.30090453706530  | 2.33663338744335  |
| H  | -3.78292172151048 | 0.54065357848723  | 3.41134344418507  |
| H  | -6.60039912253658 | -1.03550545985899 | -1.13176643833799 |
| Cd | -2.03365641396592 | 0.25881200323572  | -0.35064514763345 |
| N  | -2.51672430445836 | 0.44291562205850  | 1.80659972950326  |
| O  | -0.16022460322701 | 1.34198219345176  | 0.56340104178199  |
| H  | 0.27259982641321  | 2.29852231769989  | 2.36004139543539  |
| O  | -4.15819963666677 | -0.40511296470184 | -0.54530730157964 |
| H  | -1.72684841383859 | 1.40156446996260  | 3.53473096671029  |
| C  | -1.39562509703769 | 0.94131783700506  | 2.58652712467851  |
| H  | -0.72897161320587 | 0.09609992322134  | 2.83764728814204  |
| N  | -5.85711749059271 | -2.61746416265988 | -3.54085232515215 |
| O  | -4.62274627585092 | -2.82836092930819 | -3.28732606120834 |
| O  | -6.24931446785215 | -1.39714205801549 | -3.43357617861272 |
| O  | -6.61071625464555 | -3.50221266360216 | -3.85959821142148 |
| N  | -1.59996684118493 | 2.84439402810805  | -2.07937777359592 |
| O  | -1.87419485659102 | 3.42558033752159  | -3.11197982866049 |
| O  | -2.54740942229928 | 2.27104892879739  | -1.40265342183177 |
| O  | -0.43604153102284 | 2.77613310230080  | -1.63893279919812 |

**Table S13.** Optimized coordinates and absolute energy for Complex 6

Absolute Energy: -9475.027876 Hartree

|    |                   |                  |                   |
|----|-------------------|------------------|-------------------|
| C  | 5.50721366903224  | 3.04780801909532 | -2.25492795287054 |
| C  | 6.32464001837817  | 3.72067063959831 | -1.31062729189085 |
| C  | 7.70925180396919  | 3.62118486130025 | -1.33477584713738 |
| C  | 8.34408206079184  | 2.84844620972944 | -2.32217365544425 |
| Br | 10.24932576434474 | 2.73413812654018 | -2.36312754667060 |
| C  | 7.58529689633635  | 2.18075576367588 | -3.27256327693355 |
| C  | 6.17814653215074  | 2.24118076847376 | -3.23903912640301 |
| C  | 5.42179270420899  | 1.54332972792149 | -4.26597208389840 |
| N  | 4.20035645235242  | 1.18410974232579 | -4.10856337246934 |
| C  | 3.32241849861574  | 0.80846115998054 | -5.18935091787066 |
| C  | 2.31165159303886  | 1.97494211061282 | -5.33463688906472 |
| O  | 1.98596626794231  | 2.53700358998973 | -4.06346257691337 |
| H  | 5.83598302550680  | 4.32085900869425 | -0.54035848332995 |
| H  | 8.31015252940455  | 4.14882569202735 | -0.59047999957902 |
| H  | 8.07550448073991  | 1.58328729787070 | -4.04409082115303 |

|    |                   |                   |                   |
|----|-------------------|-------------------|-------------------|
| H  | 5.93339902257550  | 1.35330649003811  | -5.22970185309051 |
| H  | 2.78314205575163  | -0.10788132671197 | -4.89804727559413 |
| H  | 3.85031207259633  | 0.63365555932926  | -6.14403954798798 |
| H  | 2.73818699216296  | 2.75459107134545  | -5.98685116651886 |
| H  | 1.37988167174605  | 1.61180807571603  | -5.79164723678935 |
| H  | 2.62874335996880  | 3.24156500200367  | -3.86792921335195 |
| Co | 3.11815520665673  | 1.38314073458704  | -2.36283918933782 |
| O  | 4.20246348411635  | 3.18473333402249  | -2.22187506209429 |
| Br | -0.75234863928930 | 2.17693729582572  | 7.74206464641118  |
| C  | -0.11509418941842 | 1.91515562651149  | 5.95460285865875  |
| H  | 2.30985281119071  | 5.79416682338579  | 0.70402296971098  |
| C  | 0.79853154065682  | 2.78806406914817  | 5.40000416650388  |
| C  | -0.59098906900718 | 0.82272160370597  | 5.20041930333110  |
| H  | 1.17021337268223  | 3.63437576994650  | 5.98352909711469  |
| H  | -1.31378503684856 | 0.13347935178987  | 5.64448649317825  |
| C  | 1.27351203874866  | 2.61388711830732  | 4.07362042629928  |
| C  | -0.14149883667421 | 0.62280033879451  | 3.91082426442267  |
| C  | 3.20253493671179  | 5.15167097808544  | 0.59542055024880  |
| H  | 3.48972420598649  | 3.85945600259851  | -0.97399892465049 |
| C  | 0.79971523597189  | 1.49521333208739  | 3.28094942163251  |
| C  | 2.20548483210653  | 3.60154161253643  | 3.58648173834858  |
| H  | 2.48724419158111  | 4.39115272294814  | 4.30809787898984  |
| H  | -0.50253241027606 | -0.22056087051712 | 3.32089267612936  |
| Co | 2.41115949445006  | 2.26106942895241  | 0.94369404756944  |
| N  | 2.71460444320896  | 3.63532570291604  | 2.40234823137044  |
| O  | 2.86218922890503  | 4.04274733705737  | -0.21113034381222 |
| H  | 3.99856431211721  | 5.75713313634163  | 0.12913395430984  |
| O  | 1.16356235061960  | 1.24645919936792  | 2.06523985064868  |
| H  | 3.70205919938256  | 5.50560900301167  | 2.69165888199852  |
| C  | 3.64627513361505  | 4.66093449396842  | 1.97993517773039  |
| H  | 4.64641627062890  | 4.19920444474488  | 1.90079939568507  |
| H  | -0.86593841593818 | 0.87062370178518  | -0.31653624547217 |
| C  | -0.18024228646266 | 0.04755931949526  | -0.56174459012857 |
| H  | 0.17038653087481  | -0.35109272245186 | 0.40358311331551  |
| H  | -0.68813923898271 | -0.73156595833392 | -1.14253500844035 |
| C  | 1.01298780693128  | 0.57830908399231  | -1.30101944940098 |
| O  | 1.46452057213283  | 0.02404843595896  | -2.32752589980216 |
| O  | 1.62219965008287  | 1.62829337827586  | -0.86474177748464 |

|   |                  |                   |                   |
|---|------------------|-------------------|-------------------|
| H | 6.36017717620493 | 0.24131746372337  | 1.44585786519076  |
| C | 6.24424231846635 | 0.29011767295443  | 0.35468251593226  |
| H | 6.98451946037413 | 1.00424419045205  | -0.04278433591581 |
| H | 6.43490387677298 | -0.68750077136234 | -0.10442539228070 |
| C | 4.87254803712542 | 0.80668691347170  | -0.02079188649518 |
| O | 4.39702141251863 | 0.43104199139772  | -1.12759983182903 |
| O | 4.31850152046086 | 1.62414112095999  | 0.76763454737526  |

## S1. Extended Experimental and Computational Details

### S1.1. Structure Determination from Powder Data (SDPD) and Rietveld Refinement

Due to the rapid precipitation nature of the highly supersaturated reaction environments, the products were obtained as microcrystalline powders rather than single crystals. Consequently, high-resolution Powder X-ray Diffraction (PXRD) was employed for structural elucidation. The PXRD patterns were collected on a Panalytical Empyrean diffractometer using Cu-K $\alpha$  radiation ( $\lambda = 1.54056 \text{ \AA}$ ). The crystal structures were solved by direct-space methodologies utilizing the simulated annealing approach implemented in the EXPO2014 software suite.<sup>S1</sup> The theoretically optimized molecular geometries (obtained via DFT calculations) were imported as rigid bodies during the initial structure solution phase. Following the successful location of the asymmetric units, rigorous Rietveld refinements were performed to minimize the discrepancy between the experimental and calculated diffraction profiles.<sup>S2</sup> The final refinement cycles included the optimization of unit cell parameters, profile variables, and background coefficients, yielding excellent agreement factors.

It should be noted that the final  $R_{wp}$  and GOF values obtained for the complexes (e.g.,  $R_{wp} = 14.45\%$  for complex 4) are completely consistent with the accepted literature standards for *ab initio* structure determination of complex coordination networks from laboratory powder data.

The slight elevation in these profile-fitting indicators is a natural consequence of the microcrystalline nature, peak overlap, and inherent morphological microstrain induced by the rapid kinetic precipitation methodology.

## **S1.2. Computational Details**

To corroborate the experimental structural findings and to evaluate the energetic stabilities of the varying coordination topologies (e.g., the anisobidentate nitrate coordination and acetate-bridged polymeric chains), Density Functional Theory (DFT) calculations were performed using the ORCA 6.1.1 quantum chemistry program package.<sup>S3</sup> The geometry optimizations were conducted employing the B3LYP functional in conjunction with the def2-SVP basis set for all atoms.<sup>S4-S6</sup> To accurately describe the weak intermolecular interactions and packing effects, Grimme's dispersion correction with Becke-Johnson damping (D3BJ) was applied. The Resolution of Identity approximation combined with the Chain of Spheres exchange (RIJCOSX) algorithm was utilized to accelerate the energetic calculations without compromising accuracy.<sup>S7-S9</sup> The stationary points were verified as true minima by the absence of imaginary frequencies in the subsequent vibrational analyses.

Following the generation of the wavefunction (Molden format), advanced topological analyses of the electron density were carried out using the Multiwfn code (version 3.8).<sup>S10</sup> The Quantum Theory of Atoms in Molecules (QTAIM) framework, originally proposed by Bader, was employed to locate the bond critical points (BCPs) between the interacting atoms and to evaluate the local electron density properties, including the electron density ( $\rho(\mathbf{r})$ ), its Laplacian ( $\nabla^2\rho$ ), and the local potential energy density ( $V(\mathbf{r})$ ).<sup>S11</sup> The interaction energy ( $E_{\text{int}}$ ) of the non-covalent contact was estimated using the established Espinosa correlation ( $E_{\text{int}} = 0.5 V(\mathbf{r})$ ).<sup>S12</sup> Furthermore, to visually map and categorize the supramolecular contacts, the Non-Covalent Interaction (NCI) index was utilized.<sup>S13</sup> The NCI analysis was mapped by plotting the Reduced

Density Gradient (RDG) versus the electron density multiplied by the sign of the second eigenvalue of the Hessian matrix ( $\text{sign}(\lambda_2)\rho$ ), allowing for the precise differentiation between strong attractive halogen bonds and weak van der Waals forces. Subsequently, the high-resolution 3D isosurface visualizations of these computed electronic and magnetic properties were rendered utilizing the VESTA (Visualization for Electronic and Structural Analysis, version 3) software.<sup>S14</sup> The isosurface thresholds were carefully optimized (e.g., 0.02 a.u. for FMOs and 0.002–0.005 a.u. for spin densities) to accurately map the spatial distribution, orbital mixing, and spin delocalization pathways across the supramolecular frameworks.

## References

- S1 A. Altomare, C. Cuocci, C. Giacovazzo, A. Moliterni, R. Rizzi, N. Corriero and A. Falcicchio, *J. Appl. Crystallogr.* 2015, **48**, 598–603.
- S2 H. M. Rietveld, *J. Appl. Crystallogr.* 1969, **2**, 65–71.
- S3 F. Neese, DOI:[10.1002/wcms.1606](https://doi.org/10.1002/wcms.1606).
- S4 C. Lee, W. Yang and R. G. Parr, *Phys. Rev. B*, 1988, **37**, 785–789.
- S5 A. D. Becke, *J. Chem. Phys.*, 1993, **98**, 5648–5652.
- S6 F. Weigend and R. Ahlrichs, *Phys. Chem. Chem. Phys.*, 2005, **7**, 3297–3305.
- S7 S. Grimme, J. Antony, S. Ehrlich and H. Krieg, *J. Chem. Phys.*, 2010, **132**, 154104.
- S8 S. Grimme, S. Ehrlich and L. Goerigk, *Journal of Computational Chemistry*, 2011, **32**, 1456–1465.
- S9 F. Neese, F. Wennmohs, A. Hansen and U. Becker, *Chemical Physics*, 2009, **356**, 98–109.

- S10 T. Lu and F. Chen, *Journal of Computational Chemistry*, 2012, **33**, 580–592.
- S11 R. F. W. Bader, *Chem. Rev.*, 1991, **91**, 893–928.
- S12 E. Espinosa, E. Molins and C. Lecomte, *Chemical Physics Letters*, 1998, **285**, 170–173.
- S13 E. R. Johnson, S. Keinan, P. Mori-Sánchez, J. Contreras-García, A. J. Cohen and W. Yang, *J. Am. Chem. Soc.*, 2010, **132**, 6498–6506.
- S14 K. Momma and F. Izumi, *J Appl Cryst*, 2011, **44**, 1272–1276.
